# Supplementary material
Source: PubMed Central journal article supplement (PMC8159192)
Supplement: mmc1.pdf [file mmc1.pdf]

# THE LANCET

## Rheumatology

### Supplementary appendix

This appendix formed part of the original submission and has been peer reviewed.  
We post it as supplied by the authors.

Supplement to: Saxena A, Guttman A, Masson M, et al. Evaluation of SARS-CoV-2 IgG antibody reactivity in patients with systemic lupus erythematosus: analysis of a multi-racial and multi-ethnic cohort. *Lancet Rheumatol* 2021; published online May 27. [https://doi.org/10.1016/S2665-9913\(21\)00114-4](https://doi.org/10.1016/S2665-9913(21)00114-4).

## APPENDIX METHODS

All patients in the WARCOV cohort were age 18 years or older and had SLE fulfilling at least 1 of the following criteria sets: 1) the American College of Rheumatology (ACR) revised classification criteria<sup>1,2</sup>; 2) the Systemic Lupus International Collaborating Clinics classification criteria<sup>3</sup>; 3) the European League Against Rheumatism/ACR classification criteria<sup>4</sup> or had been diagnosed by a rheumatologist as having SLE (if fulfillment of classification criteria for SLE could not be confirmed due to incomplete or unavailable data). Only English-, Spanish- or Mandarin-speaking patients were included in the study.

The NYU Lupus Cohort is a prospective convenience registry open to enrollment of any patient with SLE seen at NYU Langone Health and NYC Health + Hospitals/Bellevue since 2014. All SLE patients in the NYU Lupus Cohort are age 18 or older and fulfill at least one of the following criteria for SLE: 1) the American College of Rheumatology (ACR) revised classification criteria<sup>1,2</sup>; 2) the Systemic Lupus International Collaborating Clinics (SLICC) classification criteria<sup>3</sup>; 3) the European League Against Rheumatism (EULAR)/ACR classification criteria.<sup>4</sup> All patients and controls signed an informed consent to be in the NYU Lupus Cohort. NYU Lupus Cohort consents are available in English, Spanish and Mandarin.

An additional 15 SARS-CoV-2 IgG tests were evaluated using the DiaSorin Liaison® SARS-CoV-2 S1/S2 IgG assay, 28 tests were performed at an outside lab that utilized either the Abbott Architect, Ortho Clinical Diagnostics or EuroImmun assays, 2 tests were conducted using the Elecsys® anti-SARS-CoV2 immunoassay, 1 test was performed using the ARUP qualitative chemiluminescent immunoassay, 1 test used the polyvalent microsphere immunofluorescence assay for IgG/IgM/IgA through the New York State Department of Health, and 1 test was conducted using an unknown assay at a University Hospital.

## REFERENCES

- 1 Hochberg MC. Updating the American College of Rheumatology revised criteria for the classification of systemic lupus erythematosus. *Arthritis Rheum.* 1997; **40**: 1725.
- 2 Tan EM, Cohen AS, Fries JF, *et al.* The 1982 revised criteria for the classification of systemic lupus erythematosus. *Arthritis Rheum* 1982. DOI:10.1002/art.1780251101.
- 3 Petri M, Orbai AM, Alarcón GS, *et al.* Derivation and validation of the systemic lupus international collaborating clinics classification criteria for systemic lupus erythematosus. *Arthritis Rheum* 2012. DOI:10.1002/art.34473.
- 4 Aringer M, Costenbader K, Daikh D, *et al.* 2019 European League Against Rheumatism/American College of Rheumatology Classification Criteria for Systemic Lupus Erythematosus. *Arthritis Rheumatol* 2019. DOI:10.1002/art.40930.

**SUPPLEMENTARY TABLES**

**Supplementary Table 1.** SARS-CoV-2 IgG in COVID-19 RT-PCR positive SLE patients.

| Case                           | Age Range (y) | Sex | Ethnicity/Race | Time from COVID-19 RT-PCR to first Ab test (wks) | Concurrent medications                       | COVID-19 hospitalization | Highest Ab Titer (Abbot Architect) (nl <1.4 s/c) |
|--------------------------------|---------------|-----|----------------|--------------------------------------------------|----------------------------------------------|--------------------------|--------------------------------------------------|
| <b>Negative SARS-CoV-2 IgG</b> |               |     |                |                                                  |                                              |                          |                                                  |
| 1                              | >20-25        | F   | NH/O           | 24.1                                             | HCQ                                          | N                        | 1.2                                              |
| 2                              | >55-60        | F   | H/B            | 6.4                                              | HCQ, Prednisone (10 mg/day)                  | N                        | 0.8                                              |
| 3                              | >55-60        | F   | NH/B           | 7.1                                              | HCQ, MMF, Tacrolimus, Prednisone (5 mg/day)  | Y                        | 1.0                                              |
| 4                              | >35-40        | F   | H/W            | 21.3                                             | HCQ, Cyclophosphamide, Prednisone (5 mg/day) | Y                        | 1.2                                              |
| 5                              | >35-40        | M   | H/W            | 10.3                                             | HCQ, MMF, Obinutuzumab                       | Y                        | 0.1                                              |
| <b>Positive SARS-CoV-2 IgG</b> |               |     |                |                                                  |                                              |                          |                                                  |
| 1                              | >35-40        | F   | NH/A           | 6.0                                              | HCQ, Prednisone                              | N                        | N/A                                              |
| 2                              | >50-55        | F   | NH/W           | 9.6                                              | Anakinra, Cyclosporine                       | N                        | 3.3                                              |
| 3                              | >30-35        | F   | NH/W           | 5.1                                              | HCQ, Azathioprine                            | N                        | 1.8                                              |
| 4                              | >20-25        | F   | H/O            | 30.3                                             | HCQ, Azathioprine, Prednisone                | N                        | 2.4                                              |
| 5                              | >35-40        | F   | NH/B           | 17.0                                             | HCQ, MMF                                     | N                        | 4.0                                              |
| 6                              | >50-55        | M   | NH/B           | 14.7                                             | HCQ                                          | N                        | N/A                                              |
| 7                              | >30-35        | F   | NH/W           | 6.4                                              | HCQ                                          | N                        | N/A                                              |
| 8                              | >40-45        | F   | NH/W           | 24.4                                             | HCQ, Abatacept                               | N                        | N/A                                              |
| 9                              | >85-80        | F   | H/W            | 24.7                                             | HCQ                                          | N                        | 6.4                                              |
| 10                             | >35-40        | F   | NH/O           | 4.6                                              | HCQ                                          | N                        | 7.7                                              |
| 11                             | >35-40        | F   | NH/B           | 5.7                                              | HCQ, Cyclophosphamide, Rituximab, Prednisone | N                        | 8.1                                              |
| 12                             | >25-30        | F   | H/W            | 10.9                                             | HCQ, Belimumab                               | N                        | 2.0                                              |
| 13                             | >20-25        | F   | NH/W           | 0                                                | HCQ, Azathioprine, Rituximab                 | N                        | N/A                                              |
| 14                             | >55-60        | F   | NH/B           | 18.0                                             | HCQ                                          | N                        | 7.4                                              |
| 15                             | >50-55        | F   | NH/B           | 19.1                                             | HCQ                                          | N                        | 1.8                                              |
| 16                             | >45-50        | F   | NH/B           | 3.3                                              | HCQ, MMF, Prednisone                         | N                        | 4.3                                              |
| 17                             | >30-35        | F   | NH/W           | 3.7                                              | HCQ, Prednisone                              | N                        | N/A                                              |
| 18                             | >45-50        | F   | NH/B           | 9.0                                              | MMF, Belimumab                               | Y                        | 3.6                                              |
| 19                             | >50-55        | F   | H/B            | 5.9                                              | HCQ, MMF, Prednisone                         | Y                        | 6.9                                              |
| 20                             | >35-40        | F   | NH/B           | 8.0                                              | HCQ, MMF, Prednisone                         | Y                        | 4.8                                              |
| 21                             | >65-70        | F   | H/W            | 22.4                                             | HCQ, Methotrexate, Belimumab                 | Y                        | 4.1                                              |
| 22                             | >65-70        | F   | H/W            | 26.6                                             | None                                         | Y                        | 3.9                                              |
| 23                             | >25-30        | F   | NH/B           | 21.0                                             | HCQ, MMF                                     | Y                        | 3.6                                              |
| 24                             | >55-60        | F   | NH/A           | 1.7                                              | HCQ, Rituximab                               | Y                        | 7.4                                              |

A, Asian race; Ab, Antibody; B, Black race; COVID-19, Coronavirus disease 2019; F, Female; H, Hispanic; HCQ, Hydroxychloroquine; IgG, Immunoglobulin G; IVIG, Intravenous immunoglobulin; M, Male; MMF, Mycophenolate mofetil; N/A, not available; NH, Not Hispanic; NI, Normal; NYU, New York University; O, Other race; RT-PCR, real-time reverse transcriptase polymerase chain reaction; SARS-CoV-2, severe acute respiratory syndrome coronavirus 2; S/c, Specimen calibrator; SLE, Systemic Lupus Erythematosus; W, White race; Wks, Weeks; Y, years.

**Supplementary Table 2.** Positive SARS-CoV-2 IgG SLE patients with unknown COVID-19 symptoms and no RT-PCR (NYU Lupus Cohort).

| Case | Age Range (y) | Sex | Ethnicity/Race | Concurrent medications           | COVID-19 hospitalization | Highest Ab Titer (Abbot Architect) (nl <1.4 s/c) |
|------|---------------|-----|----------------|----------------------------------|--------------------------|--------------------------------------------------|
| 1    | >30-35        | F   | NH/B           | HCQ, MMF, Tacrolimus             | N                        | 3.6                                              |
| 2    | >35-40        | F   | NH/W           | HCQ, MMF, Prednisone             | N                        | 2.7                                              |
| 3    | >25-30        | F   | H/O            | HCQ, MMF, Prednisone             | N                        | 3.7                                              |
| 4    | >30-35        | F   | H/A            | HCQ, Azathioprine                | N                        | 3.9                                              |
| 5    | >75-80        | M   | H/W            | HCQ, Prednisone                  | N                        | 6.4                                              |
| 6    | >60-65        | F   | NH/B           | HCQ                              | N                        | 5.7                                              |
| 7    | >30-35        | F   | NH/B           | None                             | N                        | N/A                                              |
| 8    | >55-60        | F   | H/W            | HCQ, Methotrexate                | N                        | 10.6                                             |
| 9    | >30-35        | F   | H/W            | HCQ, MMF, Tacrolimus, Prednisone | N                        | 1.7                                              |
| 10   | >60-65        | F   | H/W            | HCQ                              | N                        | 3.7                                              |
| 11   | >18-20        | F   | NH/W           | HCQ                              | N                        | 5.3                                              |
| 12   | >40-45        | F   | H/W            | HCQ, MMF, Prednisone             | N                        | 2.0                                              |
| 13   | >45-50        | F   | NH/B           | HCQ, MMF, Prednisone             | N                        | 3.9                                              |
| 14   | >60-65        | M   | H/W            | HCQ, Cyclophosphamide            | N                        | 2.1                                              |
| 15   | >70-75        | F   | H/W            | HCQ, Leflunomide                 | N                        | 3.2                                              |
| 16   | >25-30        | F   | H/W            | HCQ, MMF, Belimumab, Prednisone  | N                        | 5.7                                              |

A, Asian race; Ab, Antibody; B, Black race; COVID-19, Coronavirus disease 2019; F, Female; H, Hispanic; HCQ, Hydroxychloroquine; IgG, Immunoglobulin G; IVIG, Intravenous immunoglobulin; M, Male; MMF, Mycophenolate mofetil; N/A, not available; NH, Not Hispanic; NI, Normal; NYU, New York University; O, Other race; RT-PCR, real-time reverse transcriptase polymerase chain reaction; SARS-CoV-2, severe acute respiratory syndrome coronavirus 2; S/c, Specimen calibrator; SLE, Systemic Lupus Erythematosus; W, White race; Wks, Weeks; Y, years.

**Supplementary Table 3.** All SLE patients evaluated for SARS-CoV-2 IgG (with Abbot Architect platform titer if available)

| Age Range (y) | Sex | Ethnicity | Race | HCQ | IS | Pred | SARS-CoV-2 IgG Ab + | Ab Titer (s/c) |
|---------------|-----|-----------|------|-----|----|------|---------------------|----------------|
| >55-60        | F   | H         | W    | Y   | Y  | N    | Y                   | 10.59          |
| >35-40        | F   | NH        | B    | N   | Y  | Y    | Y                   | 8.10           |
| >35-40        | F   | NH        | O    | Y   | N  | N    | Y                   | 7.70           |
| >55-60        | F   | NH        | B    | Y   | N  | N    | Y                   | 7.40           |
| >55-60        | F   | NH        | A    | Y   | Y  | N    | Y                   | 7.40           |
| >50-55        | F   | H         | B    | Y   | Y  | Y    | Y                   | 6.90           |
| >75-80        | M   | H         | W    | Y   | N  | Y    | Y                   | 6.40           |
| >85-90        | F   | H         | W    | Y   | N  | N    | Y                   | 6.40           |
| >20-25        | F   | H         | W    | Y   | Y  | Y    | Y                   | 5.70           |
| >55-60        | F   | NH        | B    | Y   | N  | N    | Y                   | 5.70           |
| >18-20        | F   | NH        | W    | Y   | N  | N    | Y                   | 5.30           |
| >18-20        | F   | H         | W    | Y   | Y  | N    | Y                   | 4.90           |
| >35-40        | F   | NH        | B    | Y   | Y  | Y    | Y                   | 4.80           |
| >45-50        | F   | NH        | B    | Y   | Y  | Y    | Y                   | 4.36           |
| >65-70        | F   | H         | W    | Y   | Y  | N    | Y                   | 4.10           |
| >35-40        | F   | NH        | B    | Y   | Y  | N    | Y                   | 4.00           |
| >65-70        | F   | H         | W    | N   | N  | N    | Y                   | 3.90           |
| >30-35        | F   | H         | A    | Y   | Y  | N    | Y                   | 3.90           |
| >45-50        | F   | NH        | B    | Y   | Y  | Y    | Y                   | 3.90           |
| >60-65        | F   | H         | W    | Y   | N  | N    | Y                   | 3.70           |
| >20-25        | F   | H         | O    | Y   | Y  | Y    | Y                   | 3.70           |
| >25-30        | F   | NH        | B    | Y   | Y  | N    | Y                   | 3.60           |
| >45-50        | F   | NH        | B    | N   | Y  | Y    | Y                   | 3.60           |
| >30-35        | F   | NH        | B    | Y   | Y  | N    | Y                   | 3.60           |
| >50-55        | F   | NH        | W    | N   | Y  | N    | Y                   | 3.30           |
| >70-75        | F   | H         | W    | Y   | Y  | N    | Y                   | 3.20           |
| >60-65        | F   | H         | B    | Y   | Y  | N    | Y                   | 3.09           |
| >30-35        | F   | NH        | B    | Y   | N  | N    | Y                   | 3.00           |
| >45-50        | F   | H         | O    | Y   | N  | N    | Y                   | 3.00           |
| >35-40        | F   | NH        | W    | Y   | Y  | Y    | Y                   | 2.50           |
| >20-25        | F   | H         | O    | Y   | Y  | Y    | Y                   | 2.40           |
| >40-45        | F   | NH        | B    | Y   | N  | N    | Y                   | 2.30           |
| >25-30        | F   | H         | W    | Y   | N  | N    | Y                   | 2.20           |
| >35-40        | F   | H         | W    | Y   | N  | N    | Y                   | 2.19           |
| >60-65        | M   | H         | W    | Y   | Y  | N    | Y                   | 2.11           |
| >30-35        | F   | H         | W    | Y   | Y  | Y    | Y                   | 2.10           |
| >25-30        | F   | H         | W    | Y   | Y  | N    | Y                   | 2.00           |
| >40-45        | F   | H         | W    | Y   | Y  | Y    | Y                   | 2.00           |

|        |   |    |   |   |   |   |   |      |
|--------|---|----|---|---|---|---|---|------|
| >25-30 | F | NH | W | Y | Y | N | Y | 1.80 |
| >40-45 | F | H  | B | N | N | N | Y | 1.80 |
| >50-55 | F | NH | B | Y | N | N | Y | 1.80 |
| >30-35 | F | H  | W | Y | Y | Y | Y | 1.70 |
| >55-60 | M | NH | A | N | Y | N | N | 0.14 |
| >45-50 | F | NH | W | Y | Y | N | N | 0.00 |
| >50-55 | F | NH | W | Y | N | N | N | 0.10 |
| >35-40 | M | H  | B | Y | Y | N | N | 1.30 |
| >20-25 | F | NH | O | Y | N | N | N | 1.20 |
| >30-35 | F | NH | W | Y | N | N | N | 1.20 |
| >40-45 | F | H  | W | Y | Y | Y | N | 1.19 |
| >35-40 | F | H  | W | Y | Y | Y | N | 1.17 |
| >35-40 | F | NH | B | Y | Y | N | N | 1.10 |
| >30-35 | F | H  | W | Y | N | N | N | 1.00 |
| >35-40 | F | NH | B | Y | N | N | N | 0.90 |
| >55-60 | F | NH | W | N | N | N | N | 0.80 |
| >35-40 | F | NH | B | Y | Y | Y | N | 0.80 |
| >30-35 | F | NH | A | N | Y | N | N | 0.72 |
| >35-40 | F | NH | A | N | Y | Y | N | 0.70 |
| >35-40 | F | H  | W | N | Y | Y | N | 0.60 |
| >35-40 | F | NH | B | Y | Y | N | N | 0.60 |
| >45-50 | F | NH | B | Y | Y | Y | N | 0.60 |
| >35-40 | F | NH | A | Y | Y | N | N | 0.60 |
| >30-35 | F | NH | A | N | Y | N | N | 0.60 |
| >25-30 | F | NH | W | N | N | N | N | 0.50 |
| >30-35 | F | H  | W | Y | Y | Y | N | 0.50 |
| >20-25 | F | NH | B | Y | N | Y | N | 0.50 |
| >35-40 | F | H  | W | Y | Y | Y | N | 0.49 |
| >50-55 | F | NH | B | Y | Y | Y | N | 0.40 |
| >20-25 | F | NH | B | Y | N | N | N | 0.40 |
| >25-30 | F | NH | B | Y | Y | Y | N | 0.40 |
| >30-35 | F | H  | O | Y | N | N | N | 0.37 |
| >40-45 | F | NH | W | Y | N | N | N | 0.30 |
| >65-70 | F | NH | W | N | Y | N | N | 0.30 |
| >50-55 | F | H  | B | Y | N | Y | N | 0.30 |
| >60-65 | F | NH | B | Y | N | N | N | 0.30 |
| >25-30 | F | NH | W | N | N | N | N | 0.30 |
| >30-35 | F | H  | B | Y | Y | Y | N | 0.22 |
| >40-45 | F | NH | W | Y | Y | Y | N | 0.20 |
| >45-50 | F | NH | W | N | N | Y | N | 0.20 |
| >40-45 | F | NH | A | Y | N | N | N | 0.20 |
| >25-30 | F | NH | A | Y | Y | N | N | 0.20 |

|        |   |    |   |   |   |   |   |      |
|--------|---|----|---|---|---|---|---|------|
| >25-30 | M | H  | W | Y | Y | Y | N | 0.20 |
| >55-60 | F | H  | W | Y | N | N | N | 0.20 |
| >55-60 | F | NH | W | N | Y | Y | N | 0.20 |
| >45-50 | F | NH | B | Y | N | N | N | 0.20 |
| >30-35 | F | NH | B | Y | Y | N | N | 0.20 |
| >55-60 | F | NH | W | Y | Y | N | N | 0.20 |
| >50-55 | M | NH | B | Y | N | N | N | 0.20 |
| >30-35 | F | NH | W | N | Y | N | N | 0.20 |
| >20-25 | F | NH | A | Y | Y | Y | N | 0.20 |
| >50-55 | M | NH | A | Y | Y | Y | N | 0.15 |
| >35-40 | F | H  | W | Y | Y | Y | N | 0.13 |
| >25-30 | F | H  | W | N | N | N | N | 0.11 |
| >45-50 | F | NH | B | N | Y | N | N | 0.10 |
| >45-50 | F | H  | O | N | N | N | N | 0.10 |
| >25-30 | F | NH | B | Y | Y | N | N | 0.10 |
| >40-45 | F | H  | W | Y | N | N | N | 0.10 |
| >35-40 | M | H  | W | Y | Y | N | N | 0.10 |
| >45-50 | F | NH | B | Y | N | N | N | 0.10 |
| >25-30 | F | NH | W | Y | N | N | N | 0.10 |
| >70-75 | F | NH | B | N | N | N | N | 0.10 |
| >40-45 | F | NH | W | Y | N | N | N | 0.10 |
| >50-55 | F | NH | A | Y | N | N | N | 0.10 |
| >45-50 | F | H  | W | N | Y | Y | N | 0.10 |
| >60-65 | M | NH | W | Y | N | Y | N | 0.10 |
| >50-55 | F | H  | W | Y | N | N | N | 0.10 |
| >45-50 | F | NH | A | Y | N | N | N | 0.10 |
| >40-45 | F | NH | W | Y | N | N | N | 0.10 |
| >60-65 | F | NH | W | Y | N | N | N | 0.10 |
| >40-45 | F | NH | A | Y | Y | N | N | 0.10 |
| >55-60 | F | NH | W | Y | Y | Y | N | 0.10 |
| >55-60 | F | NH | B | Y | N | N | N | 0.10 |
| >40-45 | F | NH | W | N | N | N | N | 0.10 |
| >50-55 | F | NH | W | Y | N | Y | N | 0.10 |
| >25-30 | F | NH | B | N | Y | N | N | 0.10 |
| >25-30 | F | NH | A | Y | Y | N | N | 0.10 |
| >50-55 | F | NH | B | Y | N | N | N | 0.10 |
| >30-35 | F | NH | O | Y | Y | Y | N | 0.10 |
| >55-60 | F | NH | A | Y | N | N | N | 0.10 |
| >20-25 | F | NH | B | N | N | Y | N | 0.10 |
| >20-25 | F | NH | A | Y | Y | N | N | 0.10 |
| >30-35 | F | NH | B | Y | Y | N | N | 0.10 |
| >25-30 | F | H  | W | Y | Y | N | N | 0.10 |

|        |   |    |   |   |   |   |   |      |
|--------|---|----|---|---|---|---|---|------|
| >25-30 | F | NH | A | Y | Y | Y | N | 0.10 |
| >60-65 | M | NH | W | Y | Y | N | N | 0.10 |
| >30-35 | F | NH | B | Y | Y | N | N | 0.10 |
| >20-25 | F | NH | W | Y | Y | N | N | 0.10 |
| >45-50 | F | NH | B | Y | N | N | N | 0.10 |
| >30-35 | F | NH | W | Y | N | N | N | 0.10 |
| >25-30 | F | H  | W | Y | N | Y | N | 0.10 |
| >60-65 | F | NH | B | N | N | N | N | 0.10 |
| >45-50 | F | NH | B | Y | N | N | N | 0.10 |
| >30-35 | F | NH | B | Y | Y | N | N | 0.10 |
| >40-45 | F | H  | B | Y | N | N | N | 0.10 |
| >50-55 | F | H  | W | Y | Y | N | N | 0.10 |
| >60-65 | F | NH | W | N | N | N | N | 0.10 |
| >55-60 | F | NH | W | Y | Y | Y | N | 0.10 |
| >55-60 | F | NH | W | Y | Y | N | N | 0.10 |
| >25-30 | F | NH | W | Y | N | N | N | 0.10 |
| >20-25 | F | NH | W | Y | Y | N | N | 0.10 |
| >20-25 | F | H  | W | Y | N | Y | N | 0.10 |
| >25-30 | F | NH | A | Y | Y | Y | N | 0.10 |
| >30-35 | F | NH | B | Y | Y | Y | N | 0.10 |
| >50-55 | F | NH | W | Y | N | Y | N | 0.10 |
| >60-65 | F | NH | W | N | N | N | N | 0.10 |
| >20-25 | F | NH | B | Y | N | N | N | 0.10 |
| >55-60 | F | NH | B | Y | Y | Y | N | 0.10 |
| >30-35 | F | NH | B | Y | Y | N | N | 0.10 |
| >45-50 | F | NH | B | Y | Y | Y | N | 0.10 |
| >50-55 | M | NH | O | Y | Y | Y | N | 0.10 |
| >60-65 | F | NH | A | Y | Y | N | N | 0.09 |
| >50-55 | F | NH | B | Y | Y | N | N | 0.08 |
| >40-45 | F | NH | B | Y | N | N | N | 0.08 |
| >40-45 | F | NH | A | Y | Y | N | N | 0.08 |
| >65-70 | F | NH | B | N | N | N | N | 0.07 |
| >45-50 | F | NH | B | Y | N | Y | N | 0.07 |
| >45-50 | F | NH | B | Y | Y | N | N | 0.05 |
| >60-65 | F | H  | B | Y | N | N | N | 0.04 |
| >30-35 | F | NH | A | N | N | N | N | 0.04 |
| >20-25 | F | H  | W | Y | Y | N | N | 0.04 |
| >50-55 | F | H  | W | N | N | N | N | 0.04 |
| >20-25 | M | NH | B | Y | Y | N | N | 0.04 |
| >50-55 | F | H  | W | Y | Y | Y | N | 0.04 |
| >50-55 | F | H  | W | Y | N | Y | N | 0.03 |
| >65-70 | M | NH | B | Y | N | N | N | 0.03 |



|        |   |    |   |   |   |   |   |      |
|--------|---|----|---|---|---|---|---|------|
| >30-35 | F | NH | A | Y | Y | N | N | 0.03 |
| >45-50 | F | H  | W | N | N | N | N | 0.02 |
| >65-70 | F | H  | W | Y | N | N | N | 0.02 |
| >50-55 | F | NH | B | Y | N | N | N | 0.02 |
| >70-75 | F | H  | W | Y | N | N | N | 0.02 |
| >70-75 | F | NH | A | N | N | N | N | 0.02 |
| >55-60 | F | NH | A | Y | Y | N | N | 0.02 |
| >20-25 | F | NH | B | Y | N | N | N | 0.01 |
| >50-55 | F | NH | B | N | Y | N | N | 0.01 |
| >35-40 | F | NH | A | Y | N | N | N | 0.00 |
| >30-35 | F | NH | B | Y | Y | N | N | 0.00 |
| >40-45 | F | NH | B | Y | Y | N | N | 0.00 |
| >25-30 | F | NH | W | Y | Y | Y | N | 0.00 |
| >55-60 | F | NH | O | N | N | N | N | 0.00 |
| >50-55 | F | NH | B | Y | Y | N | N | 0.00 |
| >55-60 | F | NH | W | N | Y | N | N | 0.00 |
| >60-65 | F | NH | B | Y | N | N | N | 0.00 |
| >35-40 | F | NH | B | Y | Y | N | N | 0.00 |
| >30-35 | F | NH | W | Y | Y | N | N | 0.00 |
| >30-35 | F | H  | O | Y | N | N | N | 0.00 |
| >30-35 | F | NH | B | Y | N | Y | N | 0.00 |
| >70-75 | F | NH | W | Y | N | N | N | 0.00 |
| >45-50 | F | H  | W | N | Y | N | N | 0.00 |
| >55-60 | F | NH | W | N | N | N | N | 0.00 |
| >65-70 | F | H  | B | N | Y | N | N | 0.00 |
| >40-45 | F | H  | W | N | Y | Y | N | 0.00 |
| >50-55 | F | NH | A | N | Y | Y | N | 0.00 |
| >60-65 | F | NH | B | Y | N | Y | N | 0.00 |
| >45-50 | F | NH | W | Y | Y | N | N | 0.00 |
| >40-45 | F | H  | W | Y | Y | N | N | 0.00 |
| >65-70 | M | NH | B | N | N | N | N | 0.00 |
| >50-55 | F | NH | W | Y | N | N | N | 0.00 |
| >40-45 | F | H  | W | Y | Y | Y | N | 0.00 |
| >20-25 | F | NH | B | Y | Y | Y | N | 0.00 |
| >35-40 | F | H  | W | Y | N | N | N | 0.00 |
| >40-45 | M | NH | A | Y | N | N | N | 0.00 |
| >65-70 | F | NH | W | N | N | N | N | 0.00 |
| >30-35 | M | NH | W | Y | Y | Y | N | 0.00 |
| >65-70 | F | NH | W | Y | N | N | N | 0.00 |
| >40-45 | F | NH | B | N | N | N | N | 0.00 |
| >25-30 | F | NH | B | Y | Y | N | N | 0.00 |
| >50-55 | F | NH | B | Y | N | N | N | 0.00 |

|        |   |    |   |   |   |   |   |      |
|--------|---|----|---|---|---|---|---|------|
| >75-80 | F | NH | W | Y | Y | Y | N | 0.00 |
| >35-40 | F | H  | W | Y | N | N | N | 0.00 |
| >50-55 | F | NH | B | Y | N | N | N | 0.00 |
| >30-35 | F | NH | W | Y | Y | Y | N | 0.00 |
| >50-55 | F | H  | W | Y | Y | N | N | 0.00 |
| >25-30 | F | NH | A | Y | Y | N | N | 0.00 |
| >25-30 | F | H  | O | Y | Y | N | N | 0.00 |
| >60-65 | F | NH | A | Y | N | N | N | 0.00 |
| >60-65 | F | NH | W | Y | Y | N | N | 0.00 |
| >60-65 | F | NH | B | Y | Y | N | N | 0.00 |
| >45-50 | F | NH | B | Y | N | N | N | 0.00 |
| >30-35 | F | H  | W | N | Y | N | N | 0.00 |
| >25-30 | F | H  | W | Y | Y | Y | N | 0.00 |
| >65-70 | F | NH | W | Y | Y | N | N | 0.00 |
| >25-30 | F | NH | B | Y | Y | N | N | 0.00 |
| >65-70 | F | NH | B | Y | N | N | N | 0.00 |
| >40-45 | F | H  | W | Y | Y | Y | N | 0.00 |
| >30-35 | F | NH | W | Y | N | N | N | 0.00 |
| >60-65 | F | NH | W | Y | N | N | N | 0.00 |
| >35-40 | F | NH | B | Y | N | N | N | 0.00 |
| >30-35 | F | NH | B | Y | Y | N | N | 0.00 |
| >50-55 | F | H  | W | Y | Y | N | N | 0.00 |
| >20-25 | F | NH | B | Y | Y | N | N | 0.00 |
| >45-50 | F | NH | B | N | Y | Y | N | 0.00 |
| >30-35 | F | NH | W | Y | Y | Y | N | 0.00 |
| >40-45 | F | NH | A | Y | Y | Y | N | 0.00 |
| >20-25 | M | NH | B | Y | Y | Y | N | 0.00 |
| >70-75 | F | NH | B | Y | N | N | N | 0.00 |
| >45-50 | F | NH | A | Y | N | N | N | 0.00 |
| >25-30 | F | NH | W | Y | Y | Y | N | 0.00 |
| >20-25 | F | NH | W | Y | N | N | N | 0.00 |
| >40-45 | F | NH | A | Y | N | N | N | 0.00 |
| >20-25 | F | NH | B | Y | Y | N | N | 0.00 |
| >35-40 | F | NH | B | Y | N | N | N | 0.00 |
| >20-25 | F | NH | W | Y | N | N | N | 0.00 |
| >50-55 | F | NH | A | Y | Y | N | N | 0.00 |
| >35-40 | F | NH | W | Y | N | N | N | 0.00 |
| >30-35 | F | H  | W | Y | Y | N | N | 0.00 |
| >35-40 | F | H  | O | Y | N | N | N | 0.00 |
| >25-30 | F | NH | B | Y | Y | Y | N | 0.00 |
| >20-25 | F | NH | B | N | Y | N | N | 0.00 |
| >25-30 | F | NH | W | Y | Y | N | N | 0.00 |

|        |   |    |   |   |   |   |   |      |
|--------|---|----|---|---|---|---|---|------|
| >20-25 | F | NH | W | Y | Y | Y | N | 0.00 |
| >30-35 | F | NH | A | Y | Y | N | N | 0.00 |
| >60-65 | F | NH | W | Y | N | N | N | 0.00 |
| >65-70 | F | NH | W | Y | N | N | N | 0.00 |
| >40-45 | F | H  | O | Y | N | N | N | 0.00 |
| >20-25 | F | NH | B | Y | Y | Y | N | 0.00 |
| >30-35 | F | NH | W | Y | N | N | N | 0.00 |
| >45-50 | F | H  | B | Y | Y | N | N | N/A  |
| >35-40 | F | NH | A | Y | N | Y | Y | N/A  |
| >30-35 | F | NH | A | Y | Y | Y | Y | N/A  |
| >25-30 | F | NH | W | Y | N | N | Y | N/A  |
| >45-50 | F | NH | W | N | N | N | Y | N/A  |
| >40-45 | F | NH | W | Y | Y | N | Y | N/A  |
| >35-40 | F | NH | W | Y | N | Y | Y | N/A  |
| >50-55 | M | NH | B | Y | N | N | Y | N/A  |
| >30-35 | F | NH | B | N | N | N | Y | N/A  |
| >20-25 | F | H  | W | Y | Y | N | Y | N/A  |
| >40-45 | F | H  | O | Y | Y | N | N | N/A  |
| >35-40 | F | NH | W | Y | N | N | N | N/A  |
| >25-30 | F | H  | W | Y | Y | N | N | N/A  |
| >20-25 | F | H  | O | Y | Y | Y | N | N/A  |
| >35-40 | F | H  | B | Y | Y | N | N | N/A  |
| >35-40 | F | H  | O | Y | Y | N | N | N/A  |
| >35-40 | F | NH | B | Y | N | Y | N | N/A  |
| >30-35 | F | NH | B | Y | N | N | N | N/A  |
| >35-40 | F | NH | A | Y | N | N | N | N/A  |
| >60-65 | F | H  | O | Y | Y | Y | N | N/A  |
| >40-45 | F | H  | O | Y | Y | N | N | N/A  |
| >25-30 | F | H  | O | Y | Y | Y | N | N/A  |
| >25-30 | F | NH | B | Y | Y | N | N | N/A  |
| >35-40 | F | NH | W | Y | Y | Y | N | N/A  |
| >35-40 | F | NH | A | Y | Y | N | N | N/A  |
| >25-30 | F | NH | W | Y | N | N | N | N/A  |
| >30-35 | F | NH | B | Y | Y | Y | N | N/A  |
| >35-40 | F | NH | O | Y | Y | N | N | N/A  |
| >55-60 | F | NH | O | Y | Y | Y | N | N/A  |
| >75-80 | F | NH | W | Y | Y | N | N | N/A  |
| >50-55 | F | NH | W | N | Y | N | N | N/A  |
| >40-45 | F | NH | O | Y | N | N | N | N/A  |
| >60-65 | F | NH | W | N | N | N | N | N/A  |
| >30-35 | F | NH | B | Y | N | N | N | N/A  |
| >30-35 | F | NH | A | Y | N | N | N | N/A  |

|        |   |    |   |   |   |   |   |     |
|--------|---|----|---|---|---|---|---|-----|
| >35-40 | F | NH | W | Y | Y | N | N | N/A |
| >25-30 | F | H  | W | Y | Y | N | N | N/A |
| >40-45 | F | NH | W | Y | N | N | N | N/A |
| >25-30 | F | H  | W | Y | Y | N | N | N/A |
| >55-60 | F | H  | W | N | Y | Y | N | N/A |
| >55-60 | F | NH | W | Y | Y | N | N | N/A |
| >55-60 | F | NH | W | Y | Y | N | N | N/A |
| >40-45 | F | NH | W | Y | N | N | N | N/A |
| >45-50 | F | NH | B | Y | N | N | N | N/A |
| >35-40 | F | NH | W | Y | Y | N | N | N/A |
| >25-30 | F | NH | W | N | N | Y | N | N/A |
| >55-60 | F | H  | B | Y | N | Y | N | N/A |
| >80-85 | F | NH | W | N | Y | N | N | N/A |
| >30-35 | F | NH | B | N | Y | Y | N | N/A |
| >30-35 | F | NH | B | Y | Y | Y | N | N/A |
| >50-55 | F | NH | W | Y | N | N | N | N/A |
| >40-45 | F | NH | A | Y | N | N | N | N/A |
| >25-30 | F | NH | W | Y | N | N | N | N/A |
| >45-50 | F | NH | B | Y | Y | N | N | N/A |
| >35-40 | F | H  | W | Y | Y | Y | N | N/A |
| >35-40 | F | NH | A | Y | N | N | N | N/A |
| >30-35 | F | NH | O | Y | Y | Y | N | N/A |
| >25-30 | F | H  | W | Y | Y | N | N | N/A |
| >25-30 | F | NH | B | Y | Y | Y | N | N/A |
| >40-45 | M | NH | B | Y | Y | N | N | N/A |
| >45-50 | F | NH | A | Y | N | N | N | N/A |
| >25-30 | F | NH | A | Y | Y | Y | N | N/A |
| >60-65 | F | NH | W | Y | N | N | N | N/A |
| >50-55 | F | NH | A | Y | Y | Y | N | N/A |
| >35-40 | F | H  | W | Y | Y | Y | N | N/A |
| >40-45 | F | NH | A | Y | Y | Y | N | N/A |
| >40-45 | F | H  | W | Y | N | Y | N | N/A |
| >35-40 | F | NH | W | Y | Y | N | N | N/A |
| >40-45 | F | NH | A | N | N | Y | N | N/A |
| >35-40 | M | NH | A | Y | N | Y | N | N/A |
| >30-35 | F | NH | A | N | Y | Y | N | N/A |
| >45-50 | F | NH | A | N | Y | Y | N | N/A |
| >20-25 | F | H  | O | Y | Y | N | N | N/A |
| >40-45 | F | NH | A | Y | N | Y | N | N/A |

A, Asian race; Ab, Antibody; B, Black race; F, Female; H, Hispanic; HCQ, Hydroxychloroquine; IS, Immunosuppressant; M, Male; N/A, not available; NH, Not Hispanic; O, Other race; SARS-CoV-2, severe acute respiratory syndrome coronavirus 2; S/c, Specimen calibrator; SLE, Systemic Lupus Erythematosus; W, White race.
